# Supplementary material
Source: publisher figshare collection journal article supplement (https://tandf.figshare.com/articles/dataset/_/20361629)

Figure 4

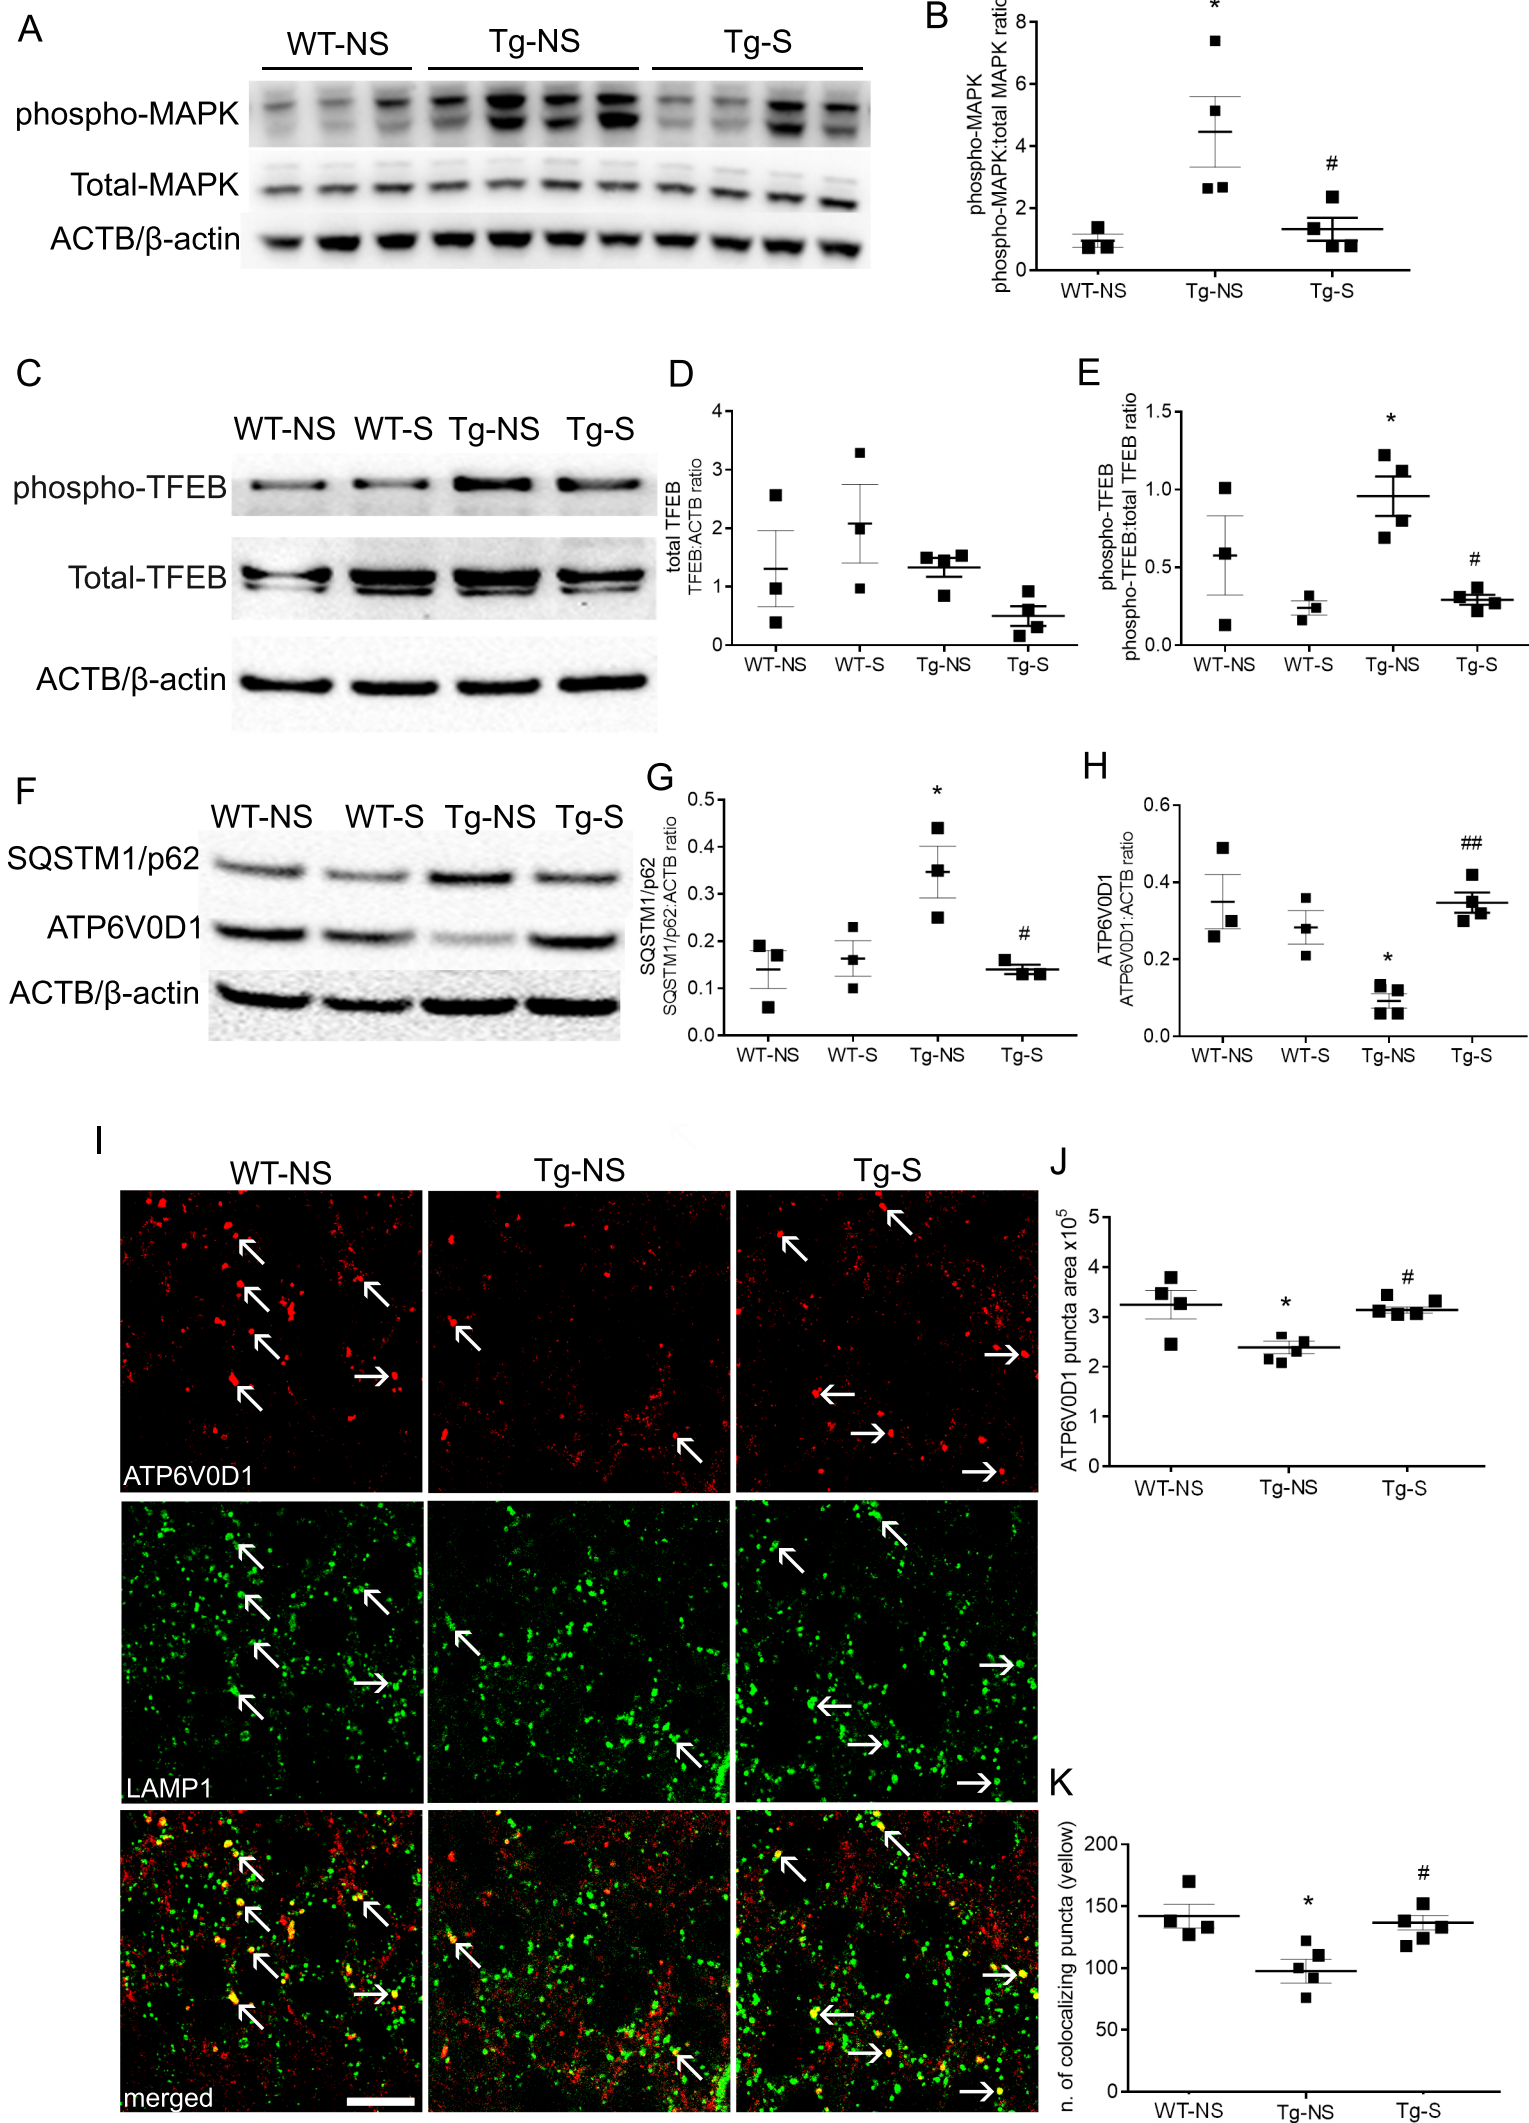

Supplement: Supplementary file 1 [file 1]

Figure 2

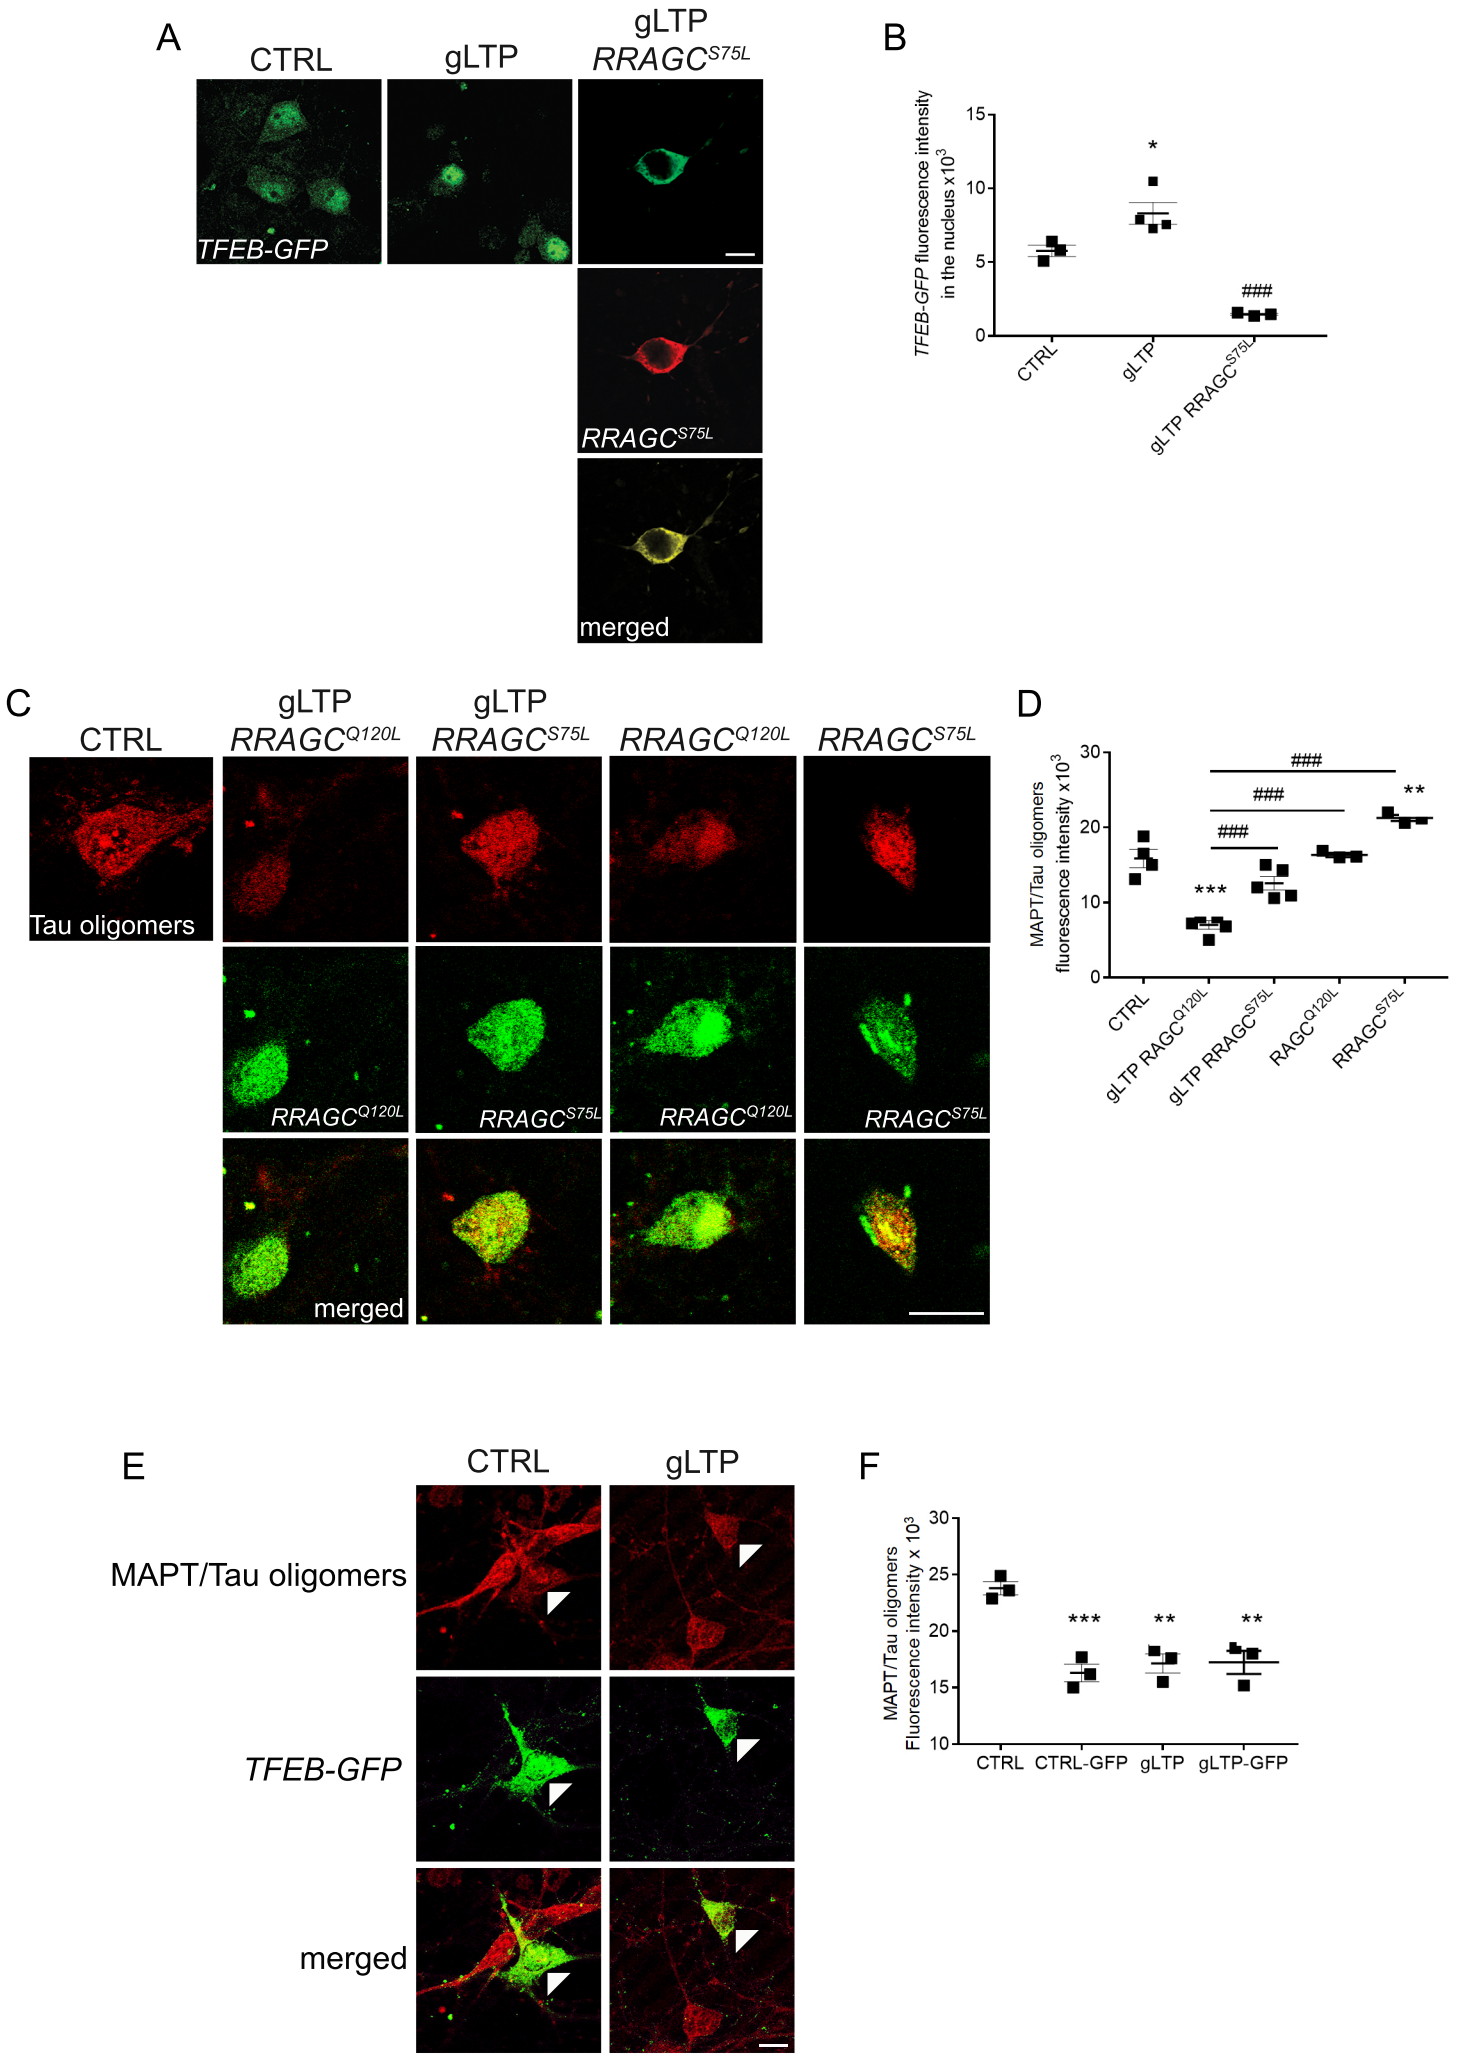

Supplement: Supplementary file 2 [file 1]

Figure 5

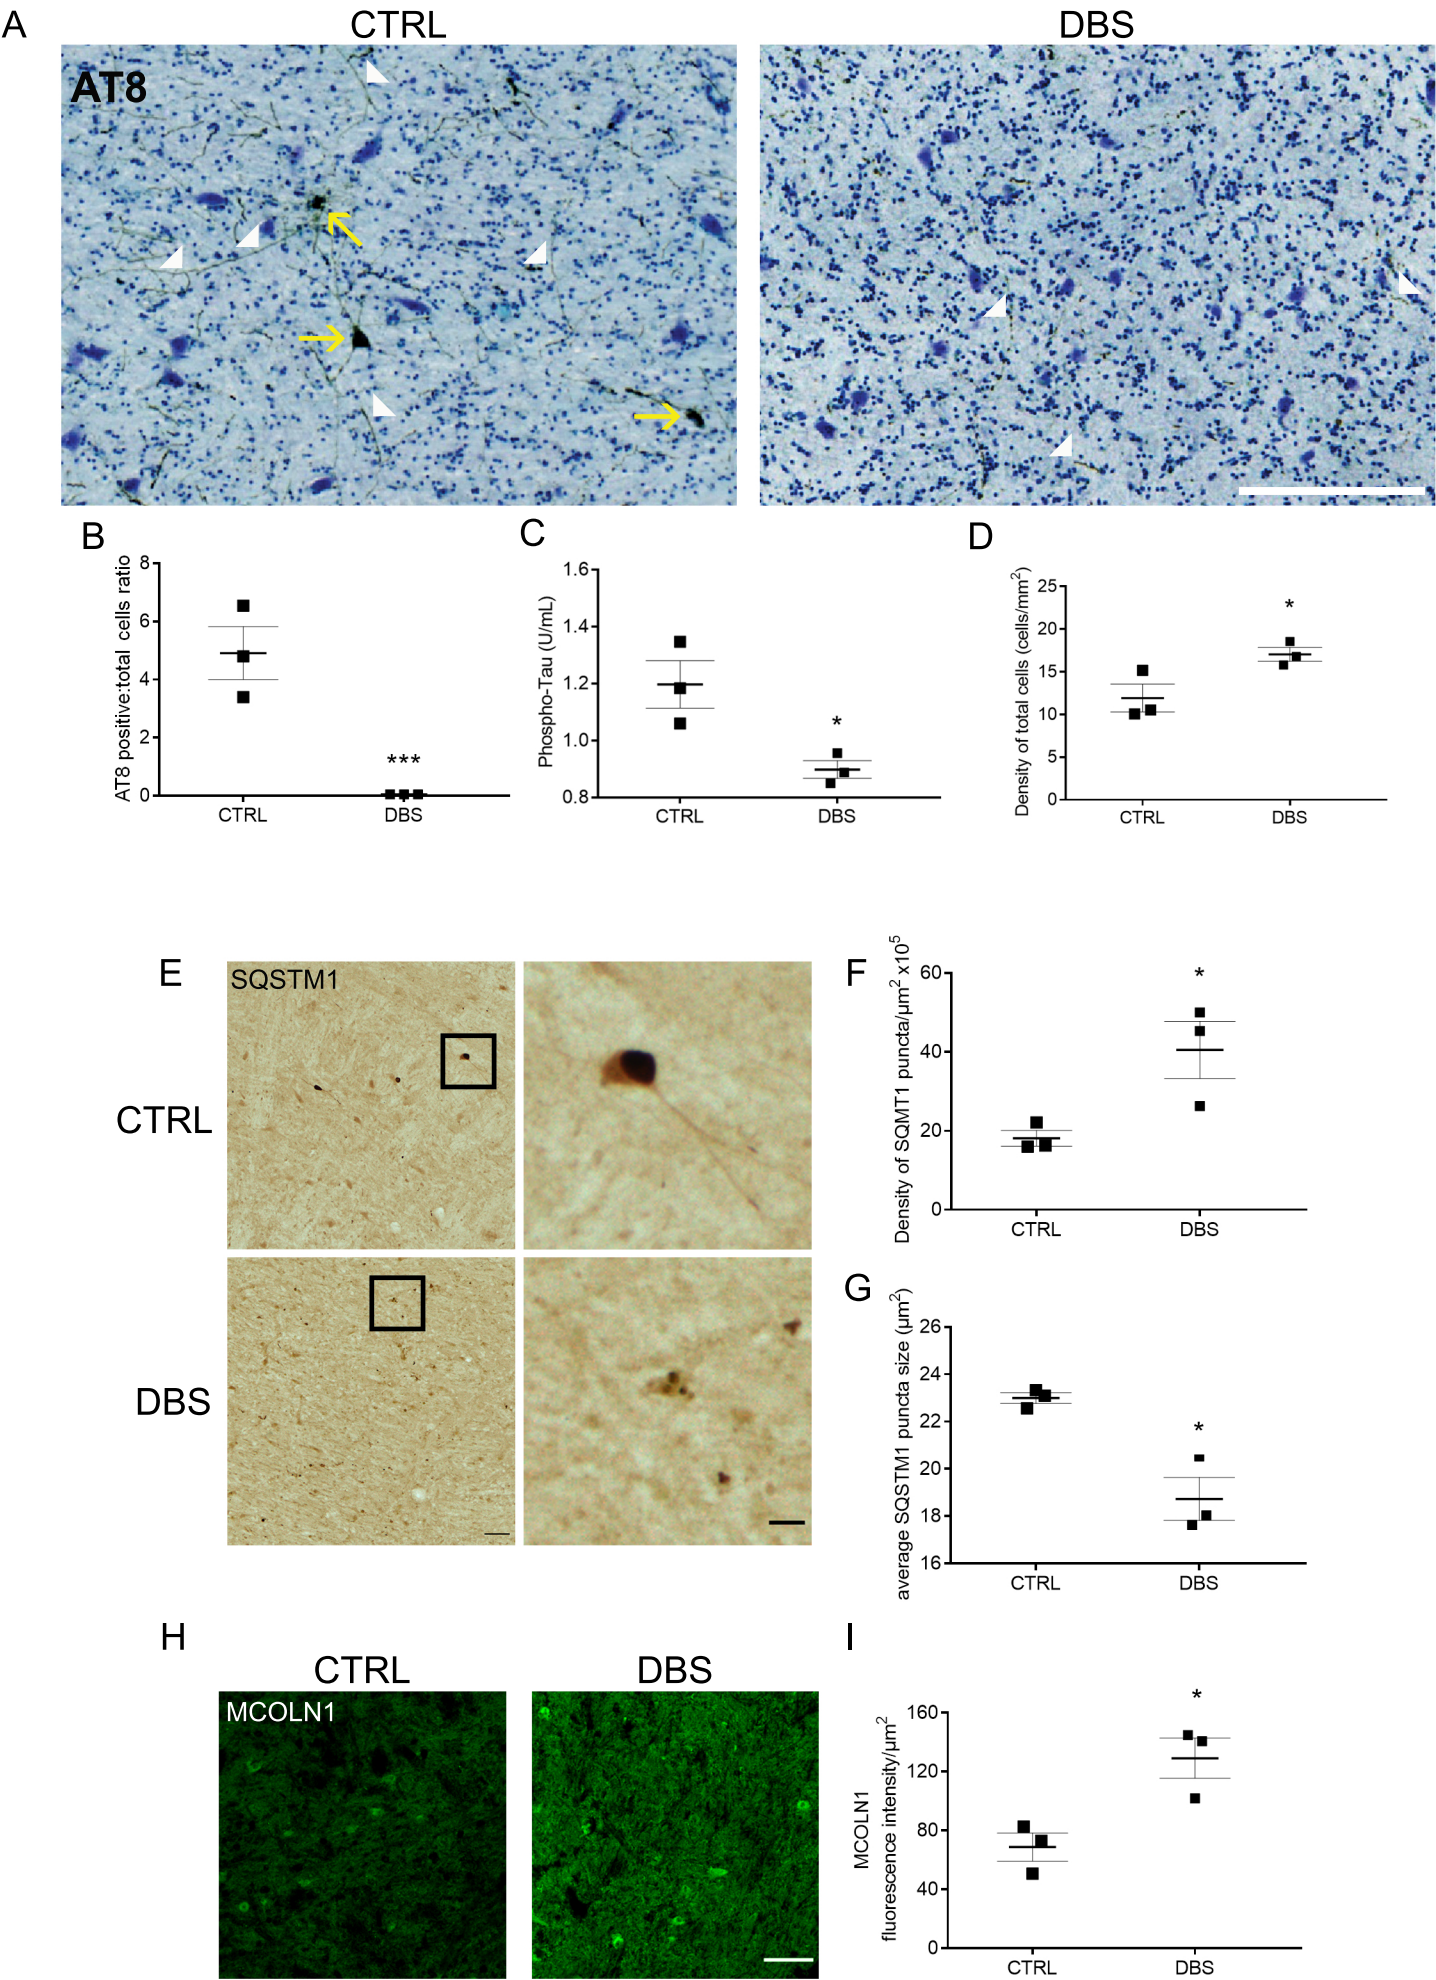

Supplement: Supplementary file 3 [file 1]

Figure 3

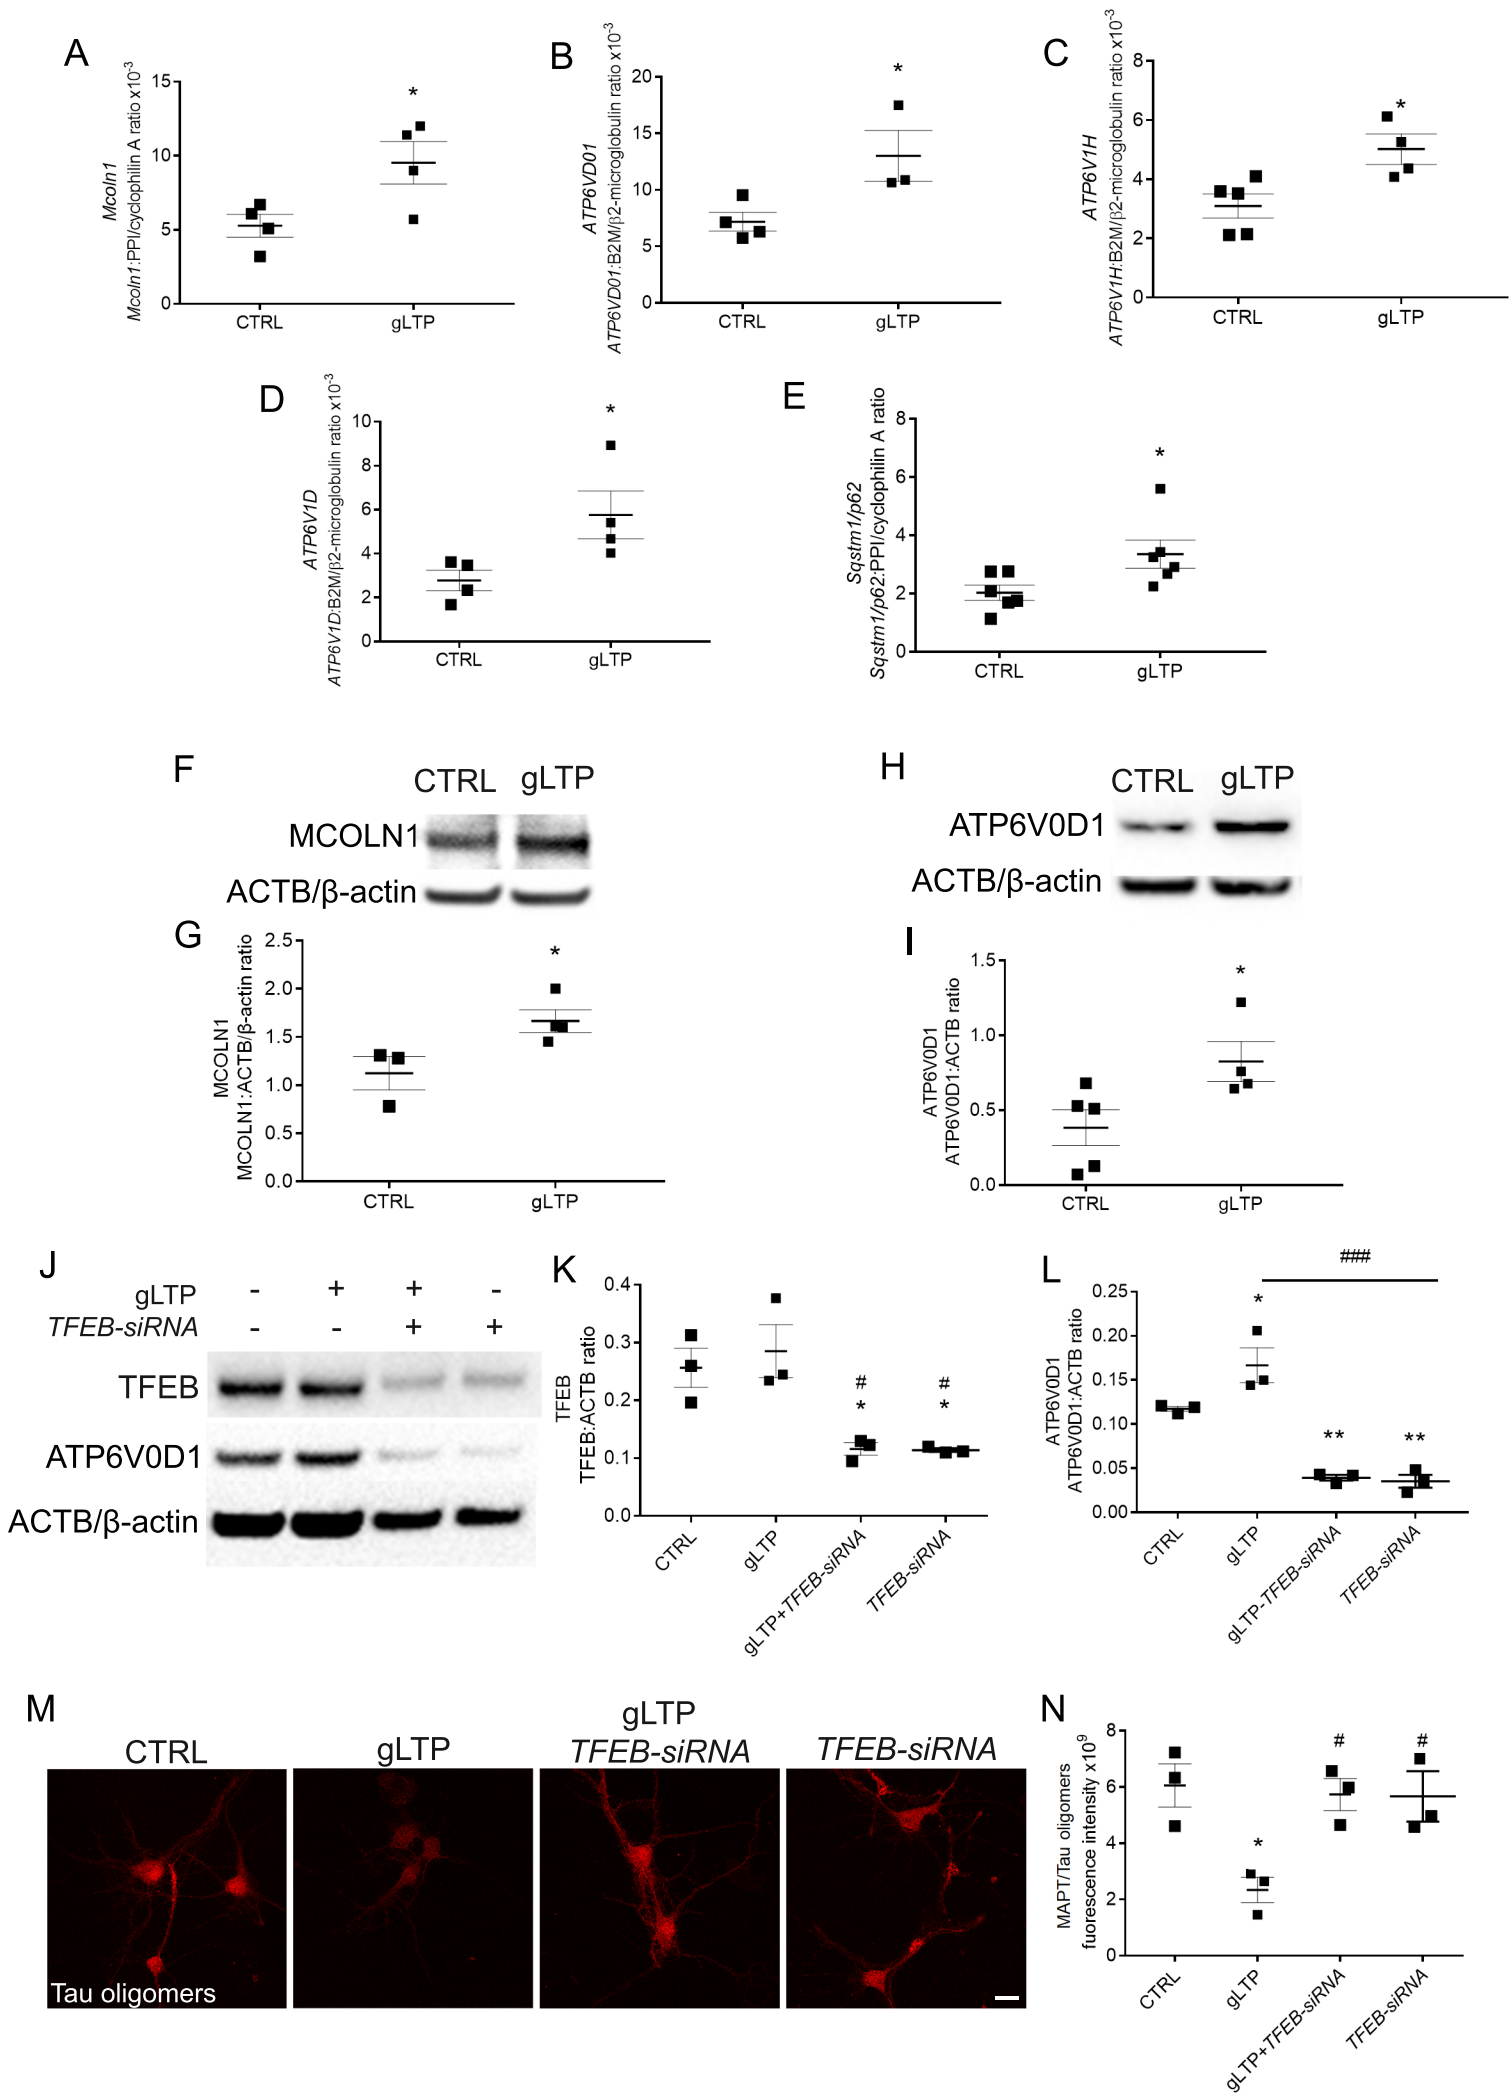

Supplement: Supplementary file 4 [file 1]

Figure 1

A

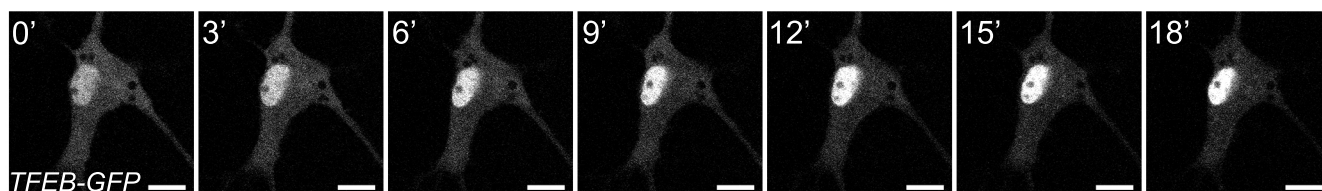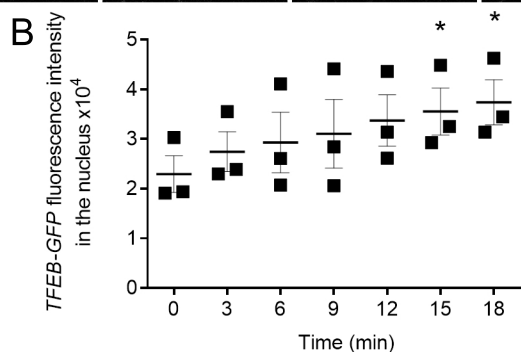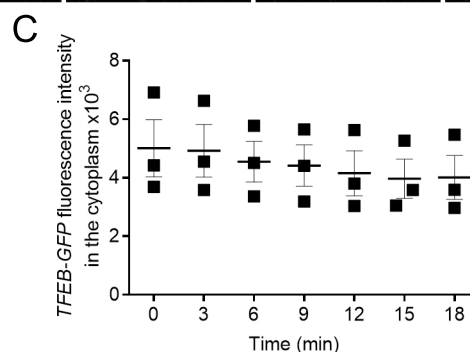

D

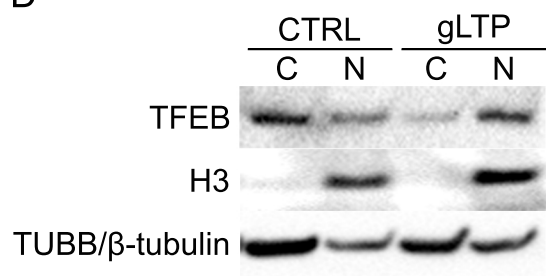

E

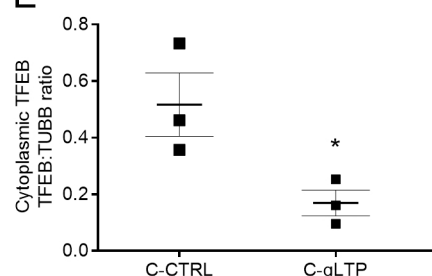

F

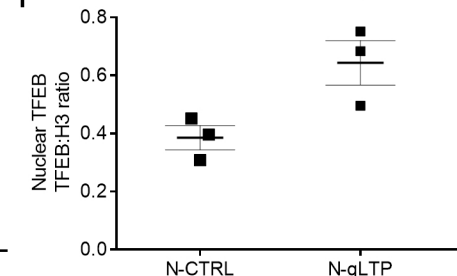

G

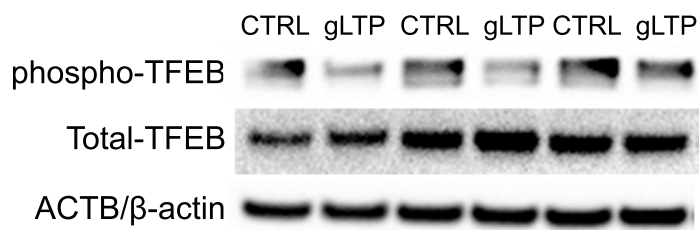

H

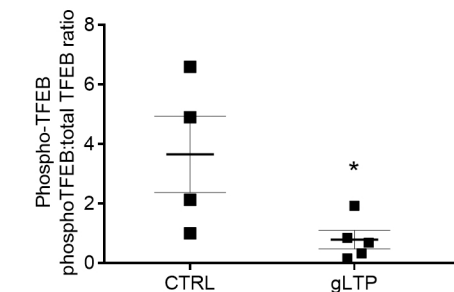

I

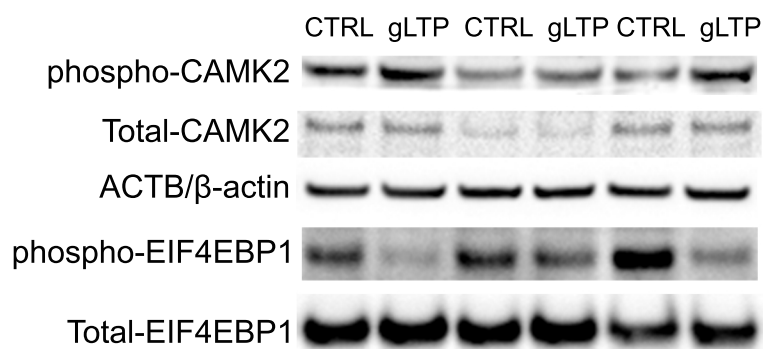

L

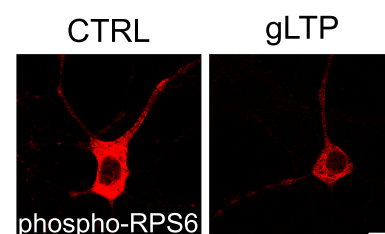

J

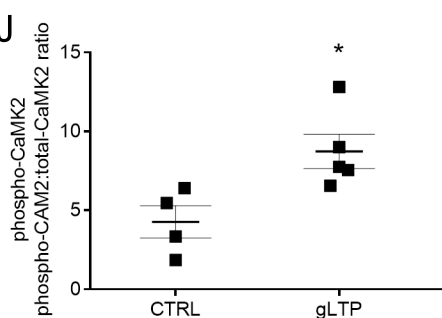

K

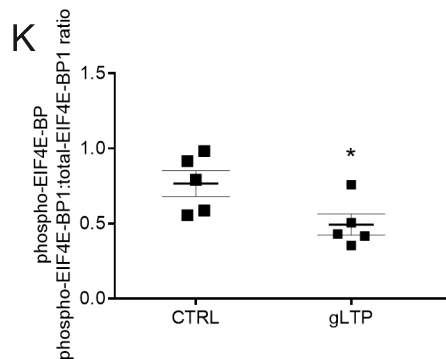

M

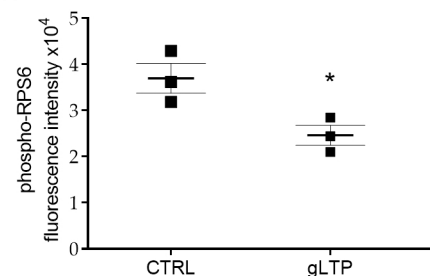

Supplement: Supplementary file 5 [file 1]
